# Supplementary material for: Tumour targeting and radiation dose of radioimmunotherapy with 90Y-rituximab in CD20+ B-cell lymphoma as predicted by 89Zr-rituximab immuno-PET: impact of preloading with unlabelled rituximab
Source: PubMed Central journal article supplement (PMC4480335; doi:10.1007/s00259-015-3025-6), 2015-03-20
Supplement: 259_2015_3025_MOESM1_ESM.pdf [file 259_2015_3025_MOESM1_ESM.pdf]

| <b>Supplementary Table 1 Residence times (hours) for 89Zr- &amp; 90Y-rituximab</b> |       |       |       |       |       |                 |       |       |       |       |  |  |
|------------------------------------------------------------------------------------|-------|-------|-------|-------|-------|-----------------|-------|-------|-------|-------|--|--|
| <b>89Zr-rituximab</b>                                                              |       |       |       |       |       |                 |       |       |       |       |  |  |
| Without pre dosing                                                                 |       |       |       |       |       | With pre dosing |       |       |       |       |  |  |
|                                                                                    | 1     | 2     | 3     | 4     | 5     | 1               | 2     | 3     | 4     | 5     |  |  |
| Skeleton                                                                           | 10,03 | 14,68 | 9,09  | 6,62  | 9,36  | 6,90            | 8,40  | 6,85  | 6,02  | 7,29  |  |  |
| Liver                                                                              | 11,49 | 10,50 | 7,98  | 8,36  | 12,03 | 12,08           | 8,98  | 9,11  | 9,09  | 8,96  |  |  |
| Spleen                                                                             | 20,44 | 8,64  | 1,24  | 1,11  | 1,11  | 1,41            | 0,68  | 1,13  | 0,47  | 0,47  |  |  |
| Kidneys                                                                            | 0,76  | 0,78  | 1,45  | 1,54  | 1,48  | 1,54            | 1,19  | 1,56  | 1,76  | 1,64  |  |  |
| Gonads                                                                             | 0,01  | 0,02  | 0,03  | 0,02  | 0,03  | 0,07            | 0,05  | 0,03  | 0,01  | 0,04  |  |  |
| Lungs                                                                              | 1,86  | 4,41  | 4,54  | 4,43  | 3,10  | 4,69            | 5,03  | 4,86  | 4,82  | 4,09  |  |  |
| Thyroid                                                                            | 0,01  | 0,01  | 0,01  | 0,03  | 0,02  | 0,03            | 0,01  | 0,01  | 0,03  | 0,02  |  |  |
| Remainder                                                                          | 26,82 | 40,64 | 50,20 | 51,37 | 55,67 | 56,17           | 54,51 | 57,53 | 52,72 | 55,60 |  |  |
| <b>90Y-rituximab</b>                                                               |       |       |       |       |       |                 |       |       |       |       |  |  |
| Without pre dosing                                                                 |       |       |       |       |       | With pre dosing |       |       |       |       |  |  |
|                                                                                    | 1     | 2     | 3     | 4     | 5     | 1               | 2     | 3     | 4     | 5     |  |  |
| Skeleton                                                                           | 8,41  | 12,07 | 6,82  | 5,53  | 7,78  | 5,74            | 7,07  | 7,76  | 5,00  | 6,17  |  |  |
| Liver                                                                              | 9,50  | 8,72  | 1,22  | 7,14  | 10,14 | 10,00           | 7,48  | 1,30  | 7,73  | 7,41  |  |  |
| Spleen                                                                             | 17,85 | 7,20  | 1,08  | 0,92  | 0,97  | 1,19            | 0,58  | 0,97  | 0,40  | 0,41  |  |  |
| Kidneys                                                                            | 0,63  | 0,66  | 3,91  | 1,29  | 1,23  | 1,28            | 1,00  | 4,15  | 1,45  | 1,35  |  |  |
| Gonads                                                                             | 0,01  | 0,01  | 0,02  | 0,02  | 0,03  | 0,06            | 0,04  | 0,02  | 0,01  | 0,03  |  |  |
| Lungs                                                                              | 1,61  | 3,91  | 7,55  | 3,80  | 2,72  | 4,02            | 4,36  | 5,69  | 4,14  | 3,56  |  |  |
| Thyroid                                                                            | 0,01  | 0,01  | 0,01  | 0,02  | 0,01  | 0,02            | 0,01  | 0,01  | 0,02  | 0,02  |  |  |
| Remainder                                                                          | 22,89 | 34,81 | 42,35 | 43,13 | 47,28 | 47,26           | 45,99 | 48,52 | 44,19 | 46,54 |  |  |
