# Supplementary material for: Tumour targeting and radiation dose of radioimmunotherapy with 90Y-rituximab in CD20+ B-cell lymphoma as predicted by 89Zr-rituximab immuno-PET: impact of preloading with unlabelled rituximab
Source: PubMed Central journal article supplement (PMC4480335; doi:10.1007/s00259-015-3025-6), 2015-03-20
Supplement: 259_2015_3025_MOESM2_ESM.pdf [file 259_2015_3025_MOESM2_ESM.pdf]

| Supplementary Table 2 Absorbed Dose [mGy/MBq] <sup>89</sup> Zr-rituximab (organs) |                    |       |       |       |       |                 |       |       |       |       |
|-----------------------------------------------------------------------------------|--------------------|-------|-------|-------|-------|-----------------|-------|-------|-------|-------|
|                                                                                   | Without pre dosing |       |       |       |       | With pre dosing |       |       |       |       |
|                                                                                   | 1                  | 2     | 3     | 4     | 5     | 1               | 2     | 3     | 4     | 5     |
| Adrenals                                                                          | 0,612              | 0,565 | 0,457 | 0,447 | 0,521 | 0,521           | 0,473 | 0,488 | 0,457 | 0,470 |
| Brain                                                                             | 0,126              | 0,188 | 0,204 | 0,202 | 0,224 | 0,220           | 0,218 | 0,224 | 0,205 | 0,218 |
| Breasts                                                                           | 0,178              | 0,226 | 0,227 | 0,226 | 0,244 | 0,252           | 0,243 | 0,250 | 0,232 | 0,238 |
| Gallbladder Wall                                                                  | 0,506              | 0,523 | 0,468 | 0,474 | 0,584 | 0,585           | 0,505 | 0,521 | 0,496 | 0,507 |
| Lower large intestine wall                                                        | 0,233              | 0,313 | 0,316 | 0,307 | 0,347 | 0,336           | 0,333 | 0,340 | 0,311 | 0,332 |
| Small Intestine                                                                   | 0,296              | 0,352 | 0,344 | 0,338 | 0,386 | 0,378           | 0,363 | 0,374 | 0,344 | 0,364 |
| Stomach Wall                                                                      | 0,616              | 0,460 | 0,337 | 0,335 | 0,373 | 0,381           | 0,348 | 0,369 | 0,333 | 0,346 |
| Upper large intestine wall                                                        | 0,304              | 0,354 | 0,344 | 0,341 | 0,393 | 0,387           | 0,365 | 0,376 | 0,348 | 0,366 |
| Heart Wall                                                                        | 0,346              | 0,390 | 0,366 | 0,363 | 0,400 | 0,414           | 0,391 | 0,401 | 0,374 | 0,381 |
| Kidneys                                                                           | 0,882              | 0,727 | 0,793 | 0,815 | 0,849 | 0,870           | 0,713 | 0,850 | 0,887 | 0,857 |
| Liver                                                                             | 1,130              | 1,080 | 0,857 | 0,885 | 1,210 | 1,220           | 0,949 | 0,965 | 0,951 | 0,944 |
| Lungs                                                                             | 0,433              | 0,654 | 0,624 | 0,610 | 0,532 | 0,669           | 0,679 | 0,670 | 0,648 | 0,594 |
| Muscle                                                                            | 0,233              | 0,268 | 0,263 | 0,261 | 0,290 | 0,291           | 0,279 | 0,288 | 0,266 | 0,278 |
| Ovaries                                                                           | 0,238              | 0,324 | 0,330 | 0,322 | 0,365 | 0,354           | 0,348 | 0,356 | 0,326 | 0,348 |
| Pancreas                                                                          | 1,020              | 0,694 | 0,440 | 0,435 | 0,496 | 0,507           | 0,446 | 0,475 | 0,428 | 0,441 |
| Red Marrow                                                                        | 0,586              | 0,788 | 0,585 | 0,496 | 0,622 | 0,536           | 0,576 | 0,531 | 0,480 | 0,536 |
| Osteogenic Cells                                                                  | 0,440              | 0,603 | 0,517 | 0,469 | 0,557 | 0,511           | 0,527 | 0,512 | 0,465 | 0,507 |
| Skin                                                                              | 0,143              | 0,176 | 0,182 | 0,182 | 0,202 | 0,202           | 0,194 | 0,202 | 0,186 | 0,195 |
| Spleen                                                                            | 12,300             | 5,350 | 0,977 | 0,894 | 0,917 | 1,100           | 0,653 | 0,929 | 0,528 | 0,530 |
| Testes                                                                            | 0,123              | 0,176 | 0,222 | 0,198 | 0,243 | 0,328           | 0,275 | 0,234 | 0,186 | 0,257 |
| Thymus                                                                            | 0,204              | 0,278 | 0,289 | 0,287 | 0,309 | 0,317           | 0,310 | 0,318 | 0,295 | 0,304 |
| Thyroid                                                                           | 0,157              | 0,214 | 0,231 | 0,296 | 0,273 | 0,322           | 0,255 | 0,261 | 0,300 | 0,291 |
| Urinary Bladder                                                                   | 0,178              | 0,252 | 0,281 | 0,281 | 0,311 | 0,309           | 0,301 | 0,313 | 0,286 | 0,304 |
| Uterus                                                                            | 0,221              | 0,298 | 0,316 | 0,313 | 0,350 | 0,344           | 0,336 | 0,347 | 0,318 | 0,337 |
