# Supplementary material for: Tumour targeting and radiation dose of radioimmunotherapy with 90Y-rituximab in CD20+ B-cell lymphoma as predicted by 89Zr-rituximab immuno-PET: impact of preloading with unlabelled rituximab
Source: PubMed Central journal article supplement (PMC4480335; doi:10.1007/s00259-015-3025-6), 2015-03-20
Supplement: 259_2015_3025_MOESM3_ESM.pdf [file 259_2015_3025_MOESM3_ESM.pdf]

| <b>Supplementary Table 3 Effective Dose [mSv/MBq] 89Zr-rituximab (whole body)</b> |                   |               |               |               |               |                |               |               |               |               |
|-----------------------------------------------------------------------------------|-------------------|---------------|---------------|---------------|---------------|----------------|---------------|---------------|---------------|---------------|
|                                                                                   | Without predosing |               |               |               |               | With predosing |               |               |               |               |
|                                                                                   | 1                 | 2             | 3             | 4             | 5             | 1              | 2             | 3             | 4             | 5             |
| Adrenals                                                                          | 0,0015            | 0,0014        | 0,0011        | 0,0011        | 0,0026        | 0,0026         | 0,0024        | 0,0024        | 0,0023        | 0,0024        |
| Brain                                                                             | 0,0003            | 0,0005        | 0,0005        | 0,0005        | 0,0011        | 0,0011         | 0,0011        | 0,0011        | 0,0010        | 0,0011        |
| Breasts                                                                           | 0,0089            | 0,0113        | 0,0114        | 0,0113        | 0,0122        | 0,0126         | 0,0122        | 0,0125        | 0,0116        | 0,0119        |
| Gallbladder Wall                                                                  | 0,0000            | 0,0000        | 0,0000        | 0,0000        | 0,0000        | 0,0000         | 0,0000        | 0,0000        | 0,0000        | 0,0000        |
| Lower large intestine wall                                                        | 0,0280            | 0,0375        | 0,0379        | 0,0369        | 0,0417        | 0,0404         | 0,0400        | 0,0408        | 0,0373        | 0,0399        |
| Small Intestine                                                                   | 0,0007            | 0,0009        | 0,0009        | 0,0008        | 0,0019        | 0,0019         | 0,0018        | 0,0019        | 0,0017        | 0,0018        |
| Stomach Wall                                                                      | 0,0739            | 0,0552        | 0,0404        | 0,0402        | 0,0447        | 0,0457         | 0,0417        | 0,0443        | 0,0400        | 0,0415        |
| Upper large intestine wall                                                        | 0,0008            | 0,0009        | 0,0009        | 0,0009        | 0,0020        | 0,0019         | 0,0018        | 0,0019        | 0,0017        | 0,0018        |
| Heart Wall                                                                        | 0,0000            | 0,0000        | 0,0000        | 0,0000        | 0,0000        | 0,0000         | 0,0000        | 0,0000        | 0,0000        | 0,0000        |
| Kidneys                                                                           | 0,0022            | 0,0018        | 0,0020        | 0,0020        | 0,0042        | 0,0044         | 0,0036        | 0,0043        | 0,0044        | 0,0043        |
| Liver                                                                             | 0,0565            | 0,0538        | 0,0428        | 0,0442        | 0,0604        | 0,0608         | 0,0474        | 0,0483        | 0,0476        | 0,0472        |
| Lungs                                                                             | 0,0520            | 0,0784        | 0,0748        | 0,0732        | 0,0638        | 0,0802         | 0,0814        | 0,0804        | 0,0777        | 0,0713        |
| Muscle                                                                            | 0,0006            | 0,0007        | 0,0007        | 0,0007        | 0,0015        | 0,0015         | 0,0014        | 0,0014        | 0,0013        | 0,0014        |
| Ovaries                                                                           | 0,0477            | 0,0648        | 0,0660        | 0,0644        | 0,0729        | 0,0707         | 0,0697        | 0,0712        | 0,0652        | 0,0695        |
| Pancreas                                                                          | 0,0026            | 0,0017        | 0,0011        | 0,0011        | 0,0025        | 0,0025         | 0,0022        | 0,0024        | 0,0021        | 0,0022        |
| Red Marrow                                                                        | 0,0704            | 0,0946        | 0,0702        | 0,0595        | 0,0746        | 0,0644         | 0,0692        | 0,0638        | 0,0576        | 0,0643        |
| Osteogenic Cells                                                                  | 0,0044            | 0,0060        | 0,0052        | 0,0047        | 0,0056        | 0,0051         | 0,0053        | 0,0051        | 0,0047        | 0,0051        |
| Skin                                                                              | 0,0014            | 0,0018        | 0,0018        | 0,0018        | 0,0020        | 0,0020         | 0,0019        | 0,0020        | 0,0019        | 0,0020        |
| Spleen                                                                            | 0,3070            | 0,1340        | 0,0244        | 0,0224        | 0,0046        | 0,0055         | 0,0033        | 0,0046        | 0,0026        | 0,0027        |
| Testes                                                                            | 0,0000            | 0,0000        | 0,0000        | 0,0000        | 0,0000        | 0,0000         | 0,0000        | 0,0000        | 0,0000        | 0,0000        |
| Thymus                                                                            | 0,0005            | 0,0007        | 0,0007        | 0,0007        | 0,0015        | 0,0016         | 0,0016        | 0,0016        | 0,0015        | 0,0015        |
| Thyroid                                                                           | 0,0079            | 0,0107        | 0,0115        | 0,0148        | 0,0136        | 0,0161         | 0,0128        | 0,0131        | 0,0150        | 0,0146        |
| Urinary Bladder                                                                   | 0,0089            | 0,0126        | 0,0140        | 0,0140        | 0,0156        | 0,0154         | 0,0151        | 0,0156        | 0,0143        | 0,0152        |
| Uterus                                                                            | 0,0006            | 0,0007        | 0,0008        | 0,0008        | 0,0018        | 0,0017         | 0,0017        | 0,0017        | 0,0016        | 0,0017        |
| <b>Whole Body</b>                                                                 | <b>0,6767</b>     | <b>0,5700</b> | <b>0,4090</b> | <b>0,3960</b> | <b>0,4308</b> | <b>0,4381</b>  | <b>0,4175</b> | <b>0,4205</b> | <b>0,3932</b> | <b>0,4032</b> |
