# Supplementary material for: Tumour targeting and radiation dose of radioimmunotherapy with 90Y-rituximab in CD20+ B-cell lymphoma as predicted by 89Zr-rituximab immuno-PET: impact of preloading with unlabelled rituximab
Source: PubMed Central journal article supplement (PMC4480335; doi:10.1007/s00259-015-3025-6), 2015-03-20
Supplement: 259_2015_3025_MOESM4_ESM.pdf [file 259_2015_3025_MOESM4_ESM.pdf]

| Supplementary Table 4 Absorbed Dose [mGy/MBq] 90Y-rituximab (organs) |                   |        |       |       |       |                |       |       |       |       |
|----------------------------------------------------------------------|-------------------|--------|-------|-------|-------|----------------|-------|-------|-------|-------|
|                                                                      | Without predosing |        |       |       |       | With predosing |       |       |       |       |
|                                                                      | 1                 | 2      | 3     | 4     | 5     | 1              | 2     | 3     | 4     | 5     |
| Adrenals                                                             | 0,167             | 0,254  | 0,309 | 0,315 | 0,346 | 0,345          | 0,336 | 0,355 | 0,323 | 0,340 |
| Brain                                                                | 0,167             | 0,254  | 0,309 | 0,315 | 0,346 | 0,345          | 0,336 | 0,355 | 0,323 | 0,340 |
| Breasts                                                              | 0,167             | 0,254  | 0,309 | 0,315 | 0,346 | 0,345          | 0,336 | 0,355 | 0,323 | 0,340 |
| Gallbladder Wall                                                     | 0,167             | 0,254  | 0,309 | 0,315 | 0,346 | 0,345          | 0,336 | 0,355 | 0,323 | 0,340 |
| Lower large intestine wall                                           | 0,167             | 0,254  | 0,309 | 0,315 | 0,346 | 0,345          | 0,336 | 0,355 | 0,323 | 0,340 |
| Small Intestine                                                      | 0,167             | 0,254  | 0,309 | 0,315 | 0,346 | 0,345          | 0,336 | 0,355 | 0,323 | 0,340 |
| Stomach Wall                                                         | 0,167             | 0,254  | 0,309 | 0,315 | 0,346 | 0,345          | 0,336 | 0,355 | 0,323 | 0,340 |
| Upper large intestine wall                                           | 0,167             | 0,254  | 0,309 | 0,315 | 0,346 | 0,345          | 0,336 | 0,355 | 0,323 | 0,340 |
| Heart Wall                                                           | 0,167             | 0,254  | 0,309 | 0,315 | 0,346 | 0,345          | 0,336 | 0,355 | 0,323 | 0,340 |
| Kidneys                                                              | 1,100             | 1,160  | 2,140 | 2,260 | 2,160 | 2,240          | 1,750 | 2,290 | 2,540 | 2,370 |
| Liver                                                                | 2,680             | 2,460  | 1,920 | 2,010 | 2,860 | 2,820          | 2,110 | 2,190 | 2,180 | 2,090 |
| Lungs                                                                | 0,868             | 2,110  | 2,110 | 2,050 | 1,460 | 2,160          | 2,350 | 2,240 | 2,230 | 1,920 |
| Muscle                                                               | 0,167             | 0,254  | 0,309 | 0,315 | 0,346 | 0,345          | 0,336 | 0,355 | 0,323 | 0,340 |
| Ovaries                                                              | 0,167             | 0,254  | 0,309 | 0,315 | 0,346 | 0,345          | 0,336 | 0,355 | 0,323 | 0,340 |
| Pancreas                                                             | 0,167             | 0,254  | 0,309 | 0,315 | 0,346 | 0,345          | 0,336 | 0,355 | 0,323 | 0,340 |
| Red Marrow                                                           | 1,890             | 2,730  | 1,790 | 1,390 | 1,880 | 1,450          | 1,730 | 1,450 | 1,280 | 1,540 |
| Osteogenic Cells                                                     | 1,380             | 2,000  | 1,470 | 1,220 | 1,570 | 1,290          | 1,460 | 1,300 | 1,160 | 1,340 |
| Skin                                                                 | 0,167             | 0,254  | 0,309 | 0,315 | 0,346 | 0,345          | 0,336 | 0,355 | 0,323 | 0,340 |
| Spleen                                                               | 51,000            | 20,600 | 3,090 | 2,620 | 2,780 | 3,400          | 1,660 | 2,760 | 1,140 | 1,160 |
| Testes                                                               | 0,158             | 0,197  | 0,315 | 0,197 | 0,342 | 0,775          | 0,526 | 0,302 | 0,131 | 0,434 |
| Thymus                                                               | 0,167             | 0,254  | 0,309 | 0,315 | 0,346 | 0,345          | 0,336 | 0,355 | 0,323 | 0,340 |
| Thyroid                                                              | 0,172             | 0,172  | 0,196 | 0,564 | 0,368 | 0,589          | 0,245 | 0,245 | 0,564 | 0,466 |
| Urinary Bladder                                                      | 0,167             | 0,254  | 0,309 | 0,315 | 0,346 | 0,345          | 0,336 | 0,355 | 0,323 | 0,340 |
| Uterus                                                               | 0,167             | 0,254  | 0,309 | 0,315 | 0,346 | 0,345          | 0,336 | 0,355 | 0,323 | 0,340 |
