# Supplementary material for: Tumour targeting and radiation dose of radioimmunotherapy with 90Y-rituximab in CD20+ B-cell lymphoma as predicted by 89Zr-rituximab immuno-PET: impact of preloading with unlabelled rituximab
Source: PubMed Central journal article supplement (PMC4480335; doi:10.1007/s00259-015-3025-6), 2015-03-20
Supplement: 259_2015_3025_MOESM5_ESM.pdf [file 259_2015_3025_MOESM5_ESM.pdf]

| <b>Supplementary Table 5 Effective Dose [mSv/MBq] 90Y-rituximab (whole body)</b> |                    |               |               |               |               |                 |               |               |               |               |
|----------------------------------------------------------------------------------|--------------------|---------------|---------------|---------------|---------------|-----------------|---------------|---------------|---------------|---------------|
|                                                                                  | Without pre dosing |               |               |               |               | With pre dosing |               |               |               |               |
|                                                                                  | 1                  | 2             | 3             | 4             | 5             | 1               | 2             | 3             | 4             | 5             |
| Adrenals                                                                         | 0,0004             | 0,0006        | 0,0008        | 0,0008        | 0,0017        | 0,0009          | 0,0017        | 0,0009        | 0,0008        | 0,0009        |
| Brain                                                                            | 0,0004             | 0,0006        | 0,0008        | 0,0008        | 0,0017        | 0,0009          | 0,0017        | 0,0009        | 0,0008        | 0,0009        |
| Breasts                                                                          | 0,0084             | 0,0127        | 0,0155        | 0,0158        | 0,0173        | 0,0173          | 0,0168        | 0,0177        | 0,0161        | 0,0170        |
| Gallbladder Wall                                                                 | 0,0000             | 0,0000        | 0,0000        | 0,0000        | 0,0000        | 0,0000          | 0,0000        | 0,0000        | 0,0000        | 0,0000        |
| Lower large intestine wall                                                       | 0,0201             | 0,0305        | 0,0371        | 0,0378        | 0,0415        | 0,0414          | 0,0403        | 0,0425        | 0,0388        | 0,0408        |
| Small Intestine                                                                  | 0,0004             | 0,0006        | 0,0008        | 0,0008        | 0,0017        | 0,0009          | 0,0017        | 0,0009        | 0,0008        | 0,0009        |
| Stomach Wall                                                                     | 0,0201             | 0,0305        | 0,0371        | 0,0378        | 0,0415        | 0,0414          | 0,0403        | 0,0425        | 0,0388        | 0,0408        |
| Upper large intestine wall                                                       | 0,0004             | 0,0006        | 0,0008        | 0,0008        | 0,0017        | 0,0009          | 0,0017        | 0,0009        | 0,0008        | 0,0009        |
| Heart Wall                                                                       | 0,0000             | 0,0000        | 0,0000        | 0,0000        | 0,0000        | 0,0000          | 0,0000        | 0,0000        | 0,0000        | 0,0000        |
| Kidneys                                                                          | 0,0028             | 0,0029        | 0,0054        | 0,0057        | 0,0108        | 0,0056          | 0,0088        | 0,0057        | 0,0636        | 0,0593        |
| Liver                                                                            | 0,1340             | 0,1230        | 0,0962        | 0,1010        | 0,1430        | 0,1410          | 0,1050        | 0,1090        | 0,1090        | 0,1050        |
| Lungs                                                                            | 0,1040             | 0,2530        | 0,2530        | 0,2460        | 0,1760        | 0,2600          | 0,2820        | 0,2680        | 0,2670        | 0,2300        |
| Muscle                                                                           | 0,0004             | 0,0006        | 0,0008        | 0,0008        | 0,0017        | 0,0009          | 0,0017        | 0,0009        | 0,0008        | 0,0009        |
| Ovaries                                                                          | 0,0335             | 0,0509        | 0,0000        | 0,0630        | 0,0691        | 0,0000          | 0,0000        | 0,0709        | 0,0646        | 0,0000        |
| Pancreas                                                                         | 0,0004             | 0,0006        | 0,0008        | 0,0008        | 0,0017        | 0,0009          | 0,0017        | 0,0009        | 0,0008        | 0,0009        |
| Red Marrow                                                                       | 0,2270             | 0,3270        | 0,2150        | 0,1660        | 0,2260        | 0,1740          | 0,2070        | 0,1740        | 0,1540        | 0,1850        |
| Osteogenic Cells                                                                 | 0,0138             | 0,0200        | 0,0147        | 0,0122        | 0,0157        | 0,0129          | 0,0146        | 0,0130        | 0,0116        | 0,0134        |
| Skin                                                                             | 0,0017             | 0,0025        | 0,0031        | 0,0032        | 0,0035        | 0,0035          | 0,0034        | 0,0036        | 0,0032        | 0,0034        |
| Spleen                                                                           | 1,2700             | 0,5140        | 0,0772        | 0,0654        | 0,0139        | 0,0849          | 0,0083        | 0,0691        | 0,0029        | 0,0029        |
| Testes                                                                           | 0,0000             | 0,0000        | 0,0631        | 0,0000        | 0,0000        | 0,1550          | 0,1050        | 0,0000        | 0,0000        | 0,0867        |
| Thymus                                                                           | 0,0004             | 0,0006        | 0,0008        | 0,0008        | 0,0017        | 0,0009          | 0,0017        | 0,0009        | 0,0008        | 0,0009        |
| Thyroid                                                                          | 0,0086             | 0,0086        | 0,0098        | 0,0282        | 0,0184        | 0,0294          | 0,0123        | 0,0123        | 0,0282        | 0,0233        |
| Urinary Bladder                                                                  | 0,0084             | 0,0127        | 0,0155        | 0,0158        | 0,0173        | 0,0173          | 0,0168        | 0,0177        | 0,0161        | 0,0170        |
| Uterus                                                                           | 0,0004             | 0,0006        | 0,0008        | 0,0008        | 0,0017        | 0,0009          | 0,0017        | 0,0009        | 0,0008        | 0,0009        |
| <b>Whole Body</b>                                                                | <b>1,8556</b>      | <b>1,3934</b> | <b>0,8489</b> | <b>0,8041</b> | <b>0,8078</b> | <b>0,9906</b>   | <b>0,8740</b> | <b>0,8531</b> | <b>0,8203</b> | <b>0,8314</b> |
